# Supplementary material for: Risk Factors of Healthcare Workers With Coronavirus Disease 2019: A Retrospective Cohort Study in a Designated Hospital of Wuhan in China
Source: Oxford University Press journal article supplement (doi:10.1093/cid/ciaa287), 2020-03-16
Supplement: ciaa287_suppl_supplementary-appendix-1.docx [file ciaa287_suppl_supplementary-appendix-1.docx]

Dear medical staff,

Thanks for your attention! We are students at Wuhan University. The Corona Virus Disease 2019 (COVID-19) epidemic affects everyone's emotion. In order to understand the situation of COVID-19 infection of medical staff in the designated hospital, explore the risk factors of medical staff infection, and protect the health of medical staff, we sincerely invite you to conduct a questionnaire survey. This research will not harm your health and will not affect your current work. All your information will be treated in strict confidence and kept by the investigator. There are 24 questions in the questionnaire. Please answer the questions based on real conditions.

Thank you for your active participation again!

Q1 Would you like to participate in this survey? yes□ no□

If yes, please sign your name in question 2 and fill in the following question. If no, the investigation ends.

Q2 Name:

Q3 Gender: male□ female□

Q4 Age: years

Q5 Occupation:

Q6 Department:

Q7 Are you working in an isolation ward? yes□ no□

If yes, how long do you work in an isolation ward every day? hours

Q8 Are you working in a non-isolation ward? yes□ no□

If yes, how long do you work in a non-isolation ward every day? hours

Q9 Do you have some acute respiratory symptoms? yes□ no□

If yes, please check the following options: (Multiple Choices)

cough □ fever □ brachypnea□ chest distress□

headache□ diarrhea□ hemoptysis□

Other:

Q10 Onset of symptoms: Y/ M/ D

Q11 Onset of fever symptoms: Y/ M/ D

Q12 Have you scanned by CT? yes□ no□

If yes, has CT been screened for suspected pneumonia? yes□ no□

If yes, onset of positive CT: Y/ M/ D

Q13 Have you been screened for viral nucleic acids? yes□ no□

If yes, which sample was taken for testing?

Throat swab □ blood□ bronchoalveolar lavage fluid□

cerebrospinal fluid□ pleural effusion □ feces□

Q14 Is there a suspected patient in the department? yes□ no□

If yes, how many people have been suspected? (fill in the numbers)

Q15 Is there a diagnosed patient in the department? yes□ no□

If yes, how many people have been diagnosed? (fill in the numbers)

Q16 Is there a suspected family member in your family? yes□ no□

If yes, how many people have been suspected? (fill in the numbers)

Q17 Is there any diagnosed family member in your family? yes□ no□

If yes, how many people have been diagnosed? (fill in the numbers)

Q18 Have you ever been to the Huanan seafood market? yes□ no□

Q19 Is there any other history of exposure? yes□ no□

If yes, please note:

Q20 Have you ever performed a medical operation with a high exposure risk? yes□ no□

If yes, please check the following options: (Multiple Choices)

Tracheal intubation□ tracheotomy□ tracheal tube removal□

sputum suction□ cardiopulmonary resuscitation□

fiber bronchoscope□ laryngoscope □

other:

Q21 Do you keep hand hygiene before contact with patients? yes□ no□

(Hand hygiene: the compliance of cleaning hands with soap and water or with antiseptic hand rub to remove transient microorganisms from hands and maintain the condition of the skin. Keep hand hygiene: The fluorescence detection method was adopted, and the relative light unit value (RLU) value of the two-hand samples was less than 60 was considered to qualify for hand hygiene. That is, )

Q22 Do you keep hand hygiene after contact with patients? yes□ no□

Q23 Do you keep “qualified hand-washing”? yes□ no□

(Qualified hand-washing: the qualified rate of the hand hygiene after six steps of hand-washing is over 90%”)

Q24 Do you have the proper personal protection equipment (PPE)? yes□ no□

(Proper PPE: Complete protective equipment at work, including hospital protective masks, round caps, gloves, protective clothing, boot covers, goggles or face shields)
